# Supplementary material for: A Phase 2/3 Multicenter, Randomized, Open-Label Study to Compare the Efficacy and Safety of Lenalidomide Versus Investigator's Choice in Patients with Relapsed or Refractory Diffuse Large B-Cell Lymphoma
Source: Oxford University Press journal article supplement (doi:10.1158/1078-0432.ccr-16-2818), 2017-04-05
Supplement: 10780432ccr162818-sup-174376_2_supp_3882765_glw88y.docx [file 10780432ccr162818-sup-174376_2_supp_3882765_glw88y.docx]

| **Supplementary Table S2. List of Primer Sequences** | | | |
| --- | --- | --- | --- |
| **Gene** | **Exon** | **Primer Name** | **Primer Sequence** |
| MYD88 | 1-5 | MYD88-FULL-F | GACCTCTCCAGATCTCAAAAGGCAGATTCC |
|  |  | MYD88-FULL-R | GCAGAAGTACATGGACAGGCAGACAGATAC |
|  |  | MYD88-SEQ-E1R | TCTCTCCATGGGAGACAGGATGCTG |
|  |  | MYD88-SEQ-E2F | TGGGTAAAGAGGTAGGCACTCCCAG |
|  |  | MYD88-SEQ-E2R | GCCCATCTGCTTCAAACACCCATGC |
|  |  | MYD88-SEQ-E3F | AAGCCTTCCCATGGAGCTCTGACCAC |
|  |  | MYD88-SEQ-E3R | GCTAGGAGGAGATGCCCAGTATCTG |
|  |  | MYD88-SEQ-E4F | ACTAAGTTGCCACAGGACCTGCAGC |
|  |  | MYD88-SEQ-E4R | ATCCAGAGGCCCCACCTACACATTC |
|  |  | MYD88-SEQ-E5F | GTTGTTAACCCTGGGGTTGAAG |
|  | 1 | MYD88-FFPE-E1.2F | TGCGGCGCCGCCTGTCTCTGTTC |
|  |  | MYD88-FFPE-E1.2R | CCCCCAGGTACGAGGCCAGGAAG |
|  | 1 | MYD88-FFPE-E1.1F | GTGCCGCAGGAGAAAGAGGAAGC |
|  |  | MYD88-FFPE-E1.1R | TCCAGTCGGCCGCCACCTGTGTC |
|  | 2 | MYD88-FFPE-E2R | CTGTCCCATGGGAACAGTATTGG |
|  |  | MYD88-FFPE-E2F | GCTGCTTTACTCTGTCTCTTCCC |
|  | 3 | MYD88-FFPE-E3.2R | CAGGGCTTCATGCATCCACGCAC |
|  |  | MYD88-FFPE-E3.2F | GCAGGAGATGATCCGGCAACTGG |
|  | 3 | MYD88-FFPE-E3.1R | CAGGACATCGCGGTCAGACACAC |
|  |  | MYD88-FFPE-E3.1F | TCCCATGGAGCTCTGACCACCAC |
|  | 4 | MYD88-SEQ-E4F | ACTAAGTTGCCACAGGACCTGCAGC |
|  |  | MYD88-SEQ-E4R | ATCCAGAGGCCCCACCTACACATTC |
|  | 5 | MYD88-FFPE-E5F | GCAAGGGCCTGATGCCAGCATG |
|  |  | MYD88-FFPE-E5R | GATACACACACACCCAGGGCCTC |
| CARD11 | 4 | CARD11 FFPE 4-1 F | CTTTTTCCACTTCCCAGTCCTC |
|  |  | CARD11 FFPE 4-1R | CAGGTCCTTGGCCTTCATCT |
|  | 4 | CARD11 FFPE 4-2 F | CACTTCCTGATGAACGAGGTC |
|  |  | CARD11 FFPE 4-2R | TTCATCTTGTAGTACCGCTCCTG |
|  | 4 | CARD11 FFPE 4-3 F | GATGAAGGAAGAGCGGGACA |
|  |  | CARD11 FFPE 4-3R | CTGGCGGAGTAGCCCTTG |
|  | 5 | CARD11 FFPE 5-1 F | TTCTTGCCACCTGCCTTCT |
|  |  | CARD11 FFPE 5-1R | TCCAGTTCCAGAACCTGCTC |
|  | 5 | CARD11 FFPE 5-2 F | CTGAAGAATGACATTGAAAATCG |
|  |  | CARD11 FFPE 5-2R | AGGCCCTCACCTGGATGAT |
|  | 6 | CARD11 FFPE 6-1 F | ACCCTGACCCTCTGAAACCT |
|  |  | CARD11 FFPE 6-1R | TGCAGGTTGTAGATCCTGTTG |
|  | 6 | CARD11 FFPE 6-2 F | GAGGACAGGCAGGAGCTG |
|  |  | CARD11 FFPE 6-4R | ACTGCCCCCTGGTGTGAA |
|  | 7 | CARD11 FFPE 7-1 F | TCGATGCGCATATTGATTTC |
|  |  | CARD11 FFPE 7-1R | CTGCAGGTGGTGCCTGTA |
|  | 8 | CARD11 FFPE 8-1 F | CCCAAAGCAGCCTTCGTC |
|  |  | CARD11 FFPE 8-1R | CTCGATCCTCATCTCGTCGT |
|  | 8 | CARD11 FFPE 8-2 F | GAGCTGGAGGAGAAGAACGA |
|  |  | CARD11 FFPE 8-2R | GGTTGTTGCTGTCCTTGGAG |
|  | 8 | CARD11 FFPE 8-3 F | CTCTCCAAGGACAGCAACAA |
|  |  | CARD11 FFPE 8-3R | CTTCAGGTGTGGGTCTCCA |
|  | 9 | CARD11 FFPE 9-1 F | CACCACTAACGCCAGCTTTT |
|  |  | CARD11 FFPE 9-1R | GAGGTGGAAGAATCGTCAGC |
|  | 9 | CARD11 FFPE 9-2 F | CAATGGTCAAGAAGCTGACG |
|  |  | CARD11 FFPE 9-2R | AGACCCTCTGCCCTGCAC |
|  |  | CARD11_1_F | GGAAGTTGCCGTGTGCGGTA |
|  |  | CARD11_1_R | GAAAGGGTAGACTCAACCGCAGGA |
|  |  | CARD11_2_F | GATTTACGTCATCTGGGCTCC |
|  |  | CARD11_2_R | GAACCATGCCACTACTGAGGAC |
|  |  | CARD11_3_F | GTCACCCTGGCGGAGTAGCC |
|  |  | CARD11_3_R | CAGTGCCTCGTGGGCAGAGT |
|  |  | CARD11_4_F | CTGGAGAAGGTTTCTTGGAGC |
|  |  | CARD11_4_R | ACACCCTGGCAGGTTCATC |
|  |  | CARD11_5_F | CCCAGGCCCTCATCTGGTTG |
|  |  | CARD11_5_R | CCCAGGATACGCCCAAGCAA |
|  |  | CARD11_6_F | TCCCCTATGTTACCTGGTCTGTAGTG |
|  |  | CARD11_6_R | GCCTGTGACTTCCAAAAAAGCC |
|  |  | CARD11_7_F | CCTCAGTGCCCTCATCTGTAAAATG |
|  |  | CARD11_7_R | CAAAGGACAAGGAGCCATTCATTG |
|  |  | CARD11_8_F | AGCGAGTCGCAGGATTTCCA |
|  |  | CARD11_8_R | CCAGAAGCCTGGGAGGAGGA |
|  |  | CARD11_9_F | GACAGACCCACCGGGAGAGG |
|  |  | CARD11_9_R | GCCGCTGTGTCTTGTCGTCC |
|  |  | CARD11_10_F | TCTCTTCCACCTCAAACCCTC |
|  |  | CARD11_10_R | ATAAGCTGGGTCCCTGGATG |
|  |  | CARD11_11_F | GGCCCGGGAACCTGATTTCT |
|  |  | CARD11_11_R | CAAGCCTCCTCCAGCCAAGG |
|  |  | CARD11_12_F | GCCCACTCTCTGCCCTCCTG |
|  |  | CARD11_12_R | TCAGAAGCAAGGCCACTCGG |
|  |  | CARD11_13_F | AAAGCCCACATGAATGGTCCC |
|  |  | CARD11_13_R | CTCAGCCATCTGTGCCAGGG |
|  |  | CARD11_14_F | CTTCTCGGAGCCAGGACAC |
|  |  | CARD11_14_R | ATGGCTGAATGCAAGGCTTAG |
|  |  | CARD11_15_F | TTGCCGTCCCTGTGTGCTCT |
|  |  | CARD11_15_R | CCCATGCTTCTGCATCCTGC |
|  |  | CARD11_16_F | GGTGAGGAAAGCTGCTGTAGG |
|  |  | CARD11_16_R | AAAGCAGTGGCCTTCTTTGG |
|  |  | CARD11_17_F | CCTACGCAGAGTCGGACACG |
|  |  | CARD11_17_R | CACAGGGTGCTTGGCAGACC |
|  |  | CARD11_18_F | AAGAAAGCGTTAGCATGGAGG |
|  |  | CARD11_18_R | GACAGGAGATGTGAGGCACTG |
|  |  | CARD11_19_F | TGGGCACCGATTCACTCATTTAC |
|  |  | CARD11_19_R | TGTAGAGATGGGGGTCTTACTATGTTG |
|  |  | CARD11_20_F | TCACACTGACGGTGGCTTC |
|  |  | CARD11_20_R | GAGGGAAGAGGAGGAAAGAGG |
|  |  | CARD11_21_F | TCGTTTGGTGAATGCAATACCTGT |
|  |  | CARD11_21_R | AGAGCCCAGAAGGTGGCAGG |
|  |  | CARD11_22_F | GGTCTCATCTCCTGGATCAGC |
|  |  | CARD11_22_R | AGGTCAGTCCCGTACTTGGTG |
|  |  | CARD11_23_F | ATAGGGAGAAGCAAGGCAGG |
|  |  | CARD11_23_R | CACCCACTGCATCTCTCTGC |
| TNFAIP3 | 2 | TNFAIP3 2.1F | TTTTCCTTTCCTTTTCAGGTGTT |
|  |  | TNFAIP3 2.1R | GCAAGTTCTGAACATTTCCAGTG |
|  | 2 | TNFAIP3 2.2F | CACCGATACACACTGGAAATGTT |
|  |  | TNFAIP3 2.2R | AGGCAAAAGAAACACAACAGAAC |
|  | 3 | TNFAIP3 3.1F | GACTTTCCTTCTCTTCTCCTCCTT |
|  |  | TNFAIP3 3.1R | GTTGCGTGTGTCTGTTTCCTT |
|  | 3 | TNFAIP3 3.2F | GTACTGAGGAAGGCGCTGTT |
|  |  | TNFAIP3 3R | CCACCATGGAGCTCTGTTAGTAG |
|  | 4 | TNFAIP3 4F | ACCCCGCTCCCCTTAGAAC |
|  |  | TNFAIP3 4R | GCATAAGGCTGAAAGCATTTAAGTA |
|  | 5 | TNFAIP3 5.1F | GGCCTCATTTTCCTTTCTCTTT |
|  |  | TNFAIP3 5.1R | GCTGTCATAGCCGAGAACAAT |
|  | 5 | TNFAIP3 5.2F | TGGAATTTACTTGCCTCTCCA |
|  |  | TNFAIP3 5.2R | AACCCTGATGTTTCAGTGTCTAGTT |
|  | 6 | TNFAIP3 6.1F | ACTTACCTATGGCCTTGTTTAGTAGAA |
|  |  | TNFAIP3 6.1R | GCTTCTCCTTCATCTCATTTTCA |
|  | 6 | TNFAIP3 6.2F | GTTCACTTTTTGACAGATCCTGA |
|  |  | TNFAIP3 6.2R | CAGATGACACAGGAGAGAGCTG |
|  | 7 | TNFAIP3 7.1F | GCTAATGATGTAAAATCTTGTGTGTG |
|  |  | TNFAIP3 7.1R | GAAGGTTCCATGGGATTCTG |
|  | 7 | TNFAIP3 7.2F | GCAGGAAAACAGCGAGCAG |
|  |  | TNFAIP3 7.2R | TGGAGTTCAGCTTTGGGAGT |
|  | 7 | TNFAIP3 7.3F | AGAGAGGCGGCAAAAGAATC |
|  |  | TNFAIP3 7.3R | GGGGCTCCTGCACTTCAT |
|  | 7 | TNFAIP3 7.4F | GACAGCACCCAGCCCTTT |
|  |  | TNFAIP3 7.4R | GATCCCATTAAATGTCCTGGTAA |
|  | 7 | TNFAIP3 7.5F | CACTTGGATCCCGGGAAGT |
|  |  | TNFAIP3 7.5R | GTTTCCAGCTCTGTGGCAAG |
|  | 7 | TNFAIP3 7.6F | CAGCGTTCCAAGTCAGATCC |
|  |  | TNFAIP3 7.6R | CCGCTGTGTTAGGAAGTCAA |
|  | 8 | TNFAIP3 8F | TGGTACTAACTAGCATCCATTCTCA |
|  |  | TNFAIP3 8R | GAGGGAAAGCTCCTCCAAGT |
|  | 9 | TNFAIP3 9.1F | TTAATGATCTGCCTGTTCTTTCC |
|  |  | TNFAIP3 9.1R | CCATCCTCTGGTTGGGATG |
|  | 9 | TNFAIP3 9.2F | CAGCGAGGAGCTCTGCAT |
|  |  | TNFAIP3 9.2R | AGGAGGTGACCCACCTGTTT |
|  | 2 | A20E2INTF | GTTTCCTGCAGGCAGCTATAGAGG |
|  |  | A20E2R | AGCTTCATGAATGGGGATCCAGCAG |
|  | 3 | A20E3INTF | ACCTTTGCTGGGTCTTACATGCAG |
|  |  | A20E3R | TATGCCCACCATGGAGCTCTGTTAG |
|  | 4-5 | A20E4-5INTF | TACAGGGAGTACAGGATACATTCAAGC |
|  |  | A20E4-5R | GGAAAACCCTGATGTTTCAGTGTCTAG |
|  | 6 | A20E6F | TGAGATCTACTTACCTATGGCCTTG |
|  |  | A20E6INTR | TCAGGTGGCTGAGGTTAAAGACAG |
|  | 7 | A20E7.1INTF | GAGCTAATGATGTAAAATCTTGTGTGTG |
|  |  | A20E7.1R | CAAAATCCGTTGTGCTGCACATTCAG |
|  | 7 | A20E7.2F | CTCTCGGGGAGAAGCCTATGAGC |
|  |  | A20E7.2INTR | GAACAAAACCCCTTCTGGACAGCAG |
|  | 8 | A20E8F | ACTGTCAGCATCTCTGTATCGGTG |
|  |  | A20E8INTR | TGTCACTGTCGGTAGAAAACGCTC |
|  | 9 | A20 EXON 9F | TGATCTGCCTGTTCTTTCCA |
|  |  | A20 EXON 9R | GGGTTCAGAGGATAGCACCA |
| CD79A | 5 | CD79B-FFPE-E5R | AGGGAGCCTGCACCCAGGTCATG |
|  |  | CD79B-FFPE-E5F | TGTGGTCCCGGCCTGAGTTCCAC |
|  | 4 | CD79B-FFPE-E4R | CTGACCCCGAGGACTCAGAGCTG |
|  |  | CD79B-FFPE-E4F | ACTCTGATCTCCATCCCTCTCCG |
|  | 1 | CD79A-E1R | ACGATTTCTATAGGCATCTTCCCTGG |
|  |  | CD79A-E1F | ACTGCTGCAACTCAAACTAACCAACC |
|  | 2 | CD79A-E2R | CCACTTCAAAGATAAACCGAGTGTCC |
|  |  | CD79A-E2F | CAACCAGGTATGTCCTCTCTCCTTCC |
|  | 3 | CD79A-E3R | CCCAAGTTTTGGATGGGGAACCTCAG |
|  |  | CD79A-E3F | TGGGTTTCAAACCGGCTTGGACAGAG |
|  | 4-5 | CD79A-E4-5F | CCAGGAGGGTCTGAAAGATATTCACC |
|  |  | CD79A-E4-5R | CCAGAAGGGCTGAAAGGAGAATGTCC |
| CD79B | 5 | CD79A-FFPE-E5R | CACTGGAGCTGGGTGCACAGCAG |
|  |  | CD79A-FFPE-E5F | AGGGTGCTGATGTTCGCTGCCTC |
|  | 4 | CD79B-FFPE-E4R-NEW | ACACCAGCAGATAGTGGCCACTGAC |
|  |  | CD79B-FFPE-E4F-NEW | GGGGGACACTAACACTCTGATCTCC |
|  |  | CD79B_1_F | GGTGCAGTTACACGTTTTCCTCC |
|  |  | CD79B_1_R | TGGTTGCGGGAGAGGAATGATG |
|  |  | CD79B-E1R | GCCCAGACAGCTGGAGATGAGAG |
|  |  | CD79B-E2F | GCTCCGGGAACATAGAGGGCATG |
|  |  | CD79B-E2R | GGACAGGGACCATAGTCGGACAC |
|  |  | CD79B-E3F | TGGGGCTGGCACTCAGGAAGATG |
|  |  | CD79B-E3R | GGGCCATGACCATCACCACAAGAG |
|  |  | CD79B-E4F | ACCTGAGGGAGCTGCCCTTGTAG |
|  |  | CD79B-E4R | ACCCTGCATATGCCTGGCCTATGC |
|  |  | CD79B-E5-6F | GCAGAATGCACCTCACTCCTGACC |
|  |  | CD79B-E5-6R | GCAGCTCCGAAGCAGTCACTGAG |
