# Supplementary figures and images for: A Phase 2/3 Multicenter, Randomized, Open-Label Study to Compare the Efficacy and Safety of Lenalidomide Versus Investigator's Choice in Patients with Relapsed or Refractory Diffuse Large B-Cell Lymphoma
Source: Oxford University Press journal article supplement (doi:10.1158/1078-0432.ccr-16-2818), 2017-04-05

**Supplementary Fig. S1**. **DLC-001 Study Design (CONSORT diagram).**


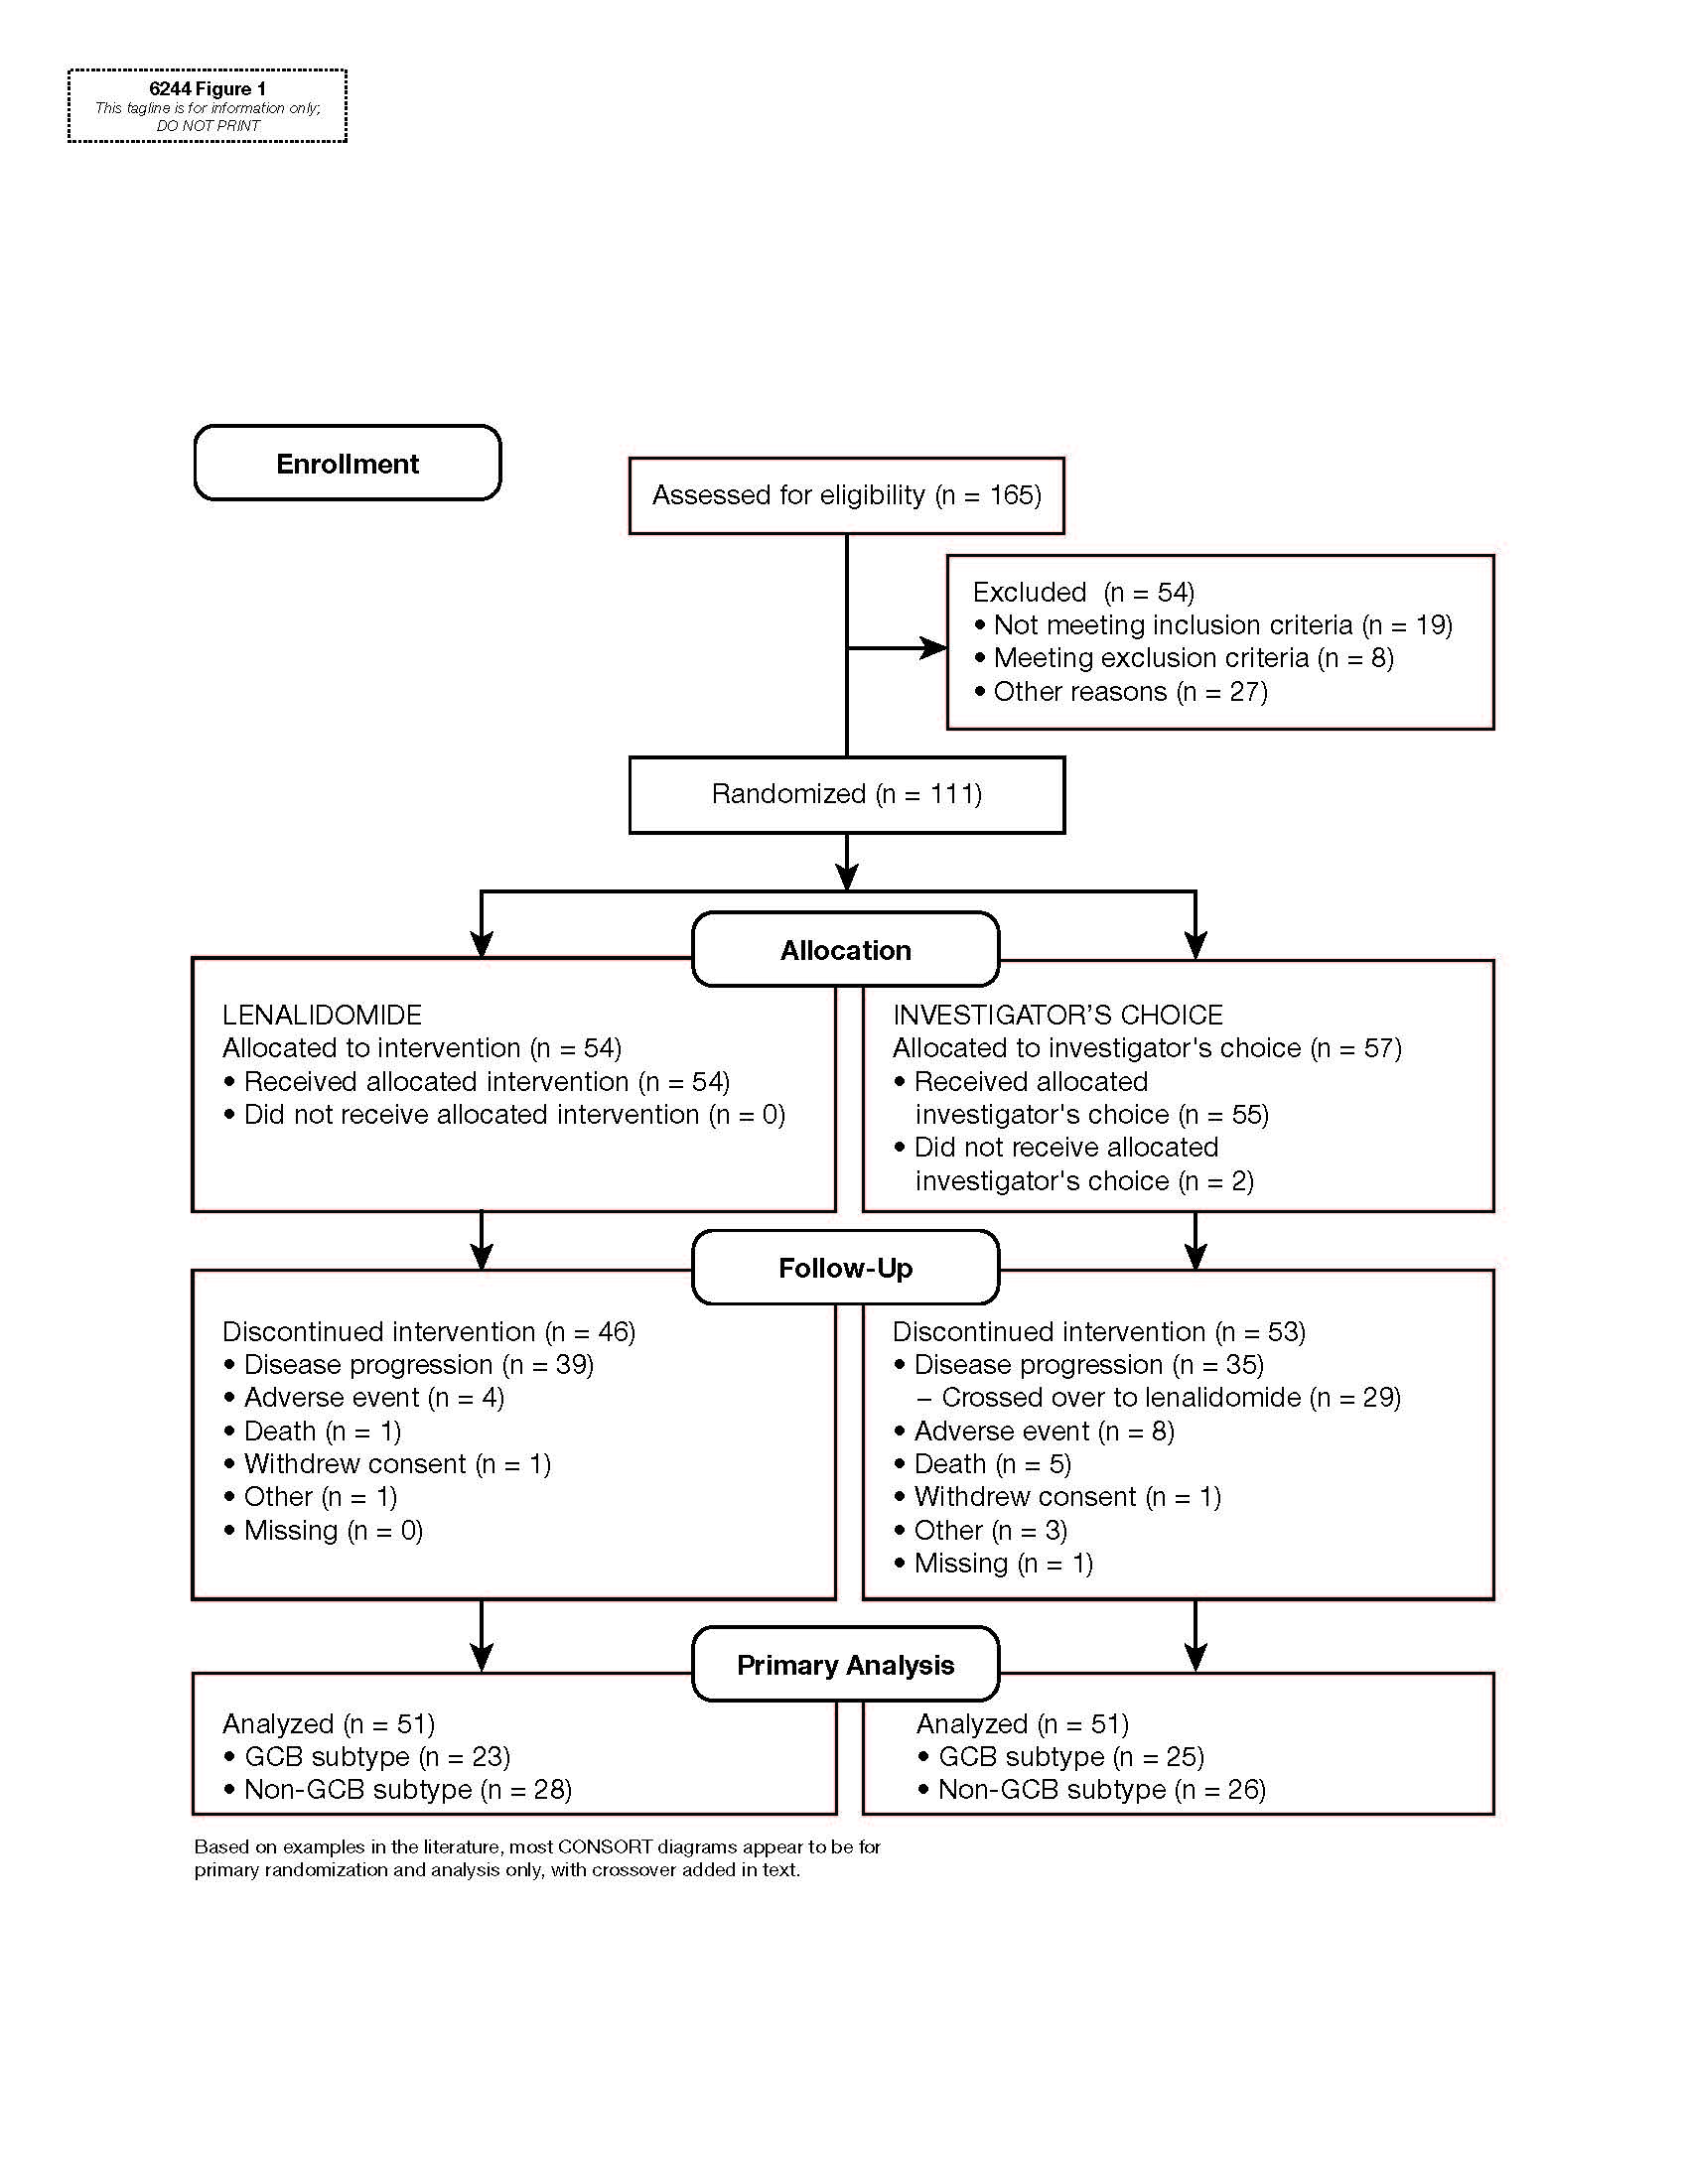

Supplement: 10780432ccr162818-sup-174376_2_supp_3882766_8lw88y.docx [file 10780432ccr162818-sup-174376_2_supp_3882766_8lw88y.docx]
